# Supplementary material for: Structure prediction of protein-ligand complexes from sequence information with Umol
Source: PubMed Central journal article supplement (PMC11133481; doi:10.1038/s41467-024-48837-6), 2024-05-28
Supplement: 41467_2024_48837_MOESM3_ESM.pdf [file 41467_2024_48837_MOESM3_ESM.pdf]

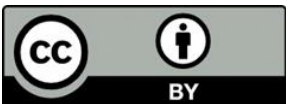

**Open Access** This file is licensed under a Creative Commons Attribution 4.0 International License, which permits use, sharing, adaptation, distribution and reproduction in any medium or format, as long as you give appropriate credit to the original author(s) and the source, provide a link to the Creative Commons license, and indicate if changes were made. In the cases where the authors are anonymous, such as is the case for the reports of anonymous peer reviewers, author attribution should be to 'Anonymous Referee' followed by a clear attribution to the source work. The images or other third party material in this file are included in the article's Creative Commons license, unless indicated otherwise in a credit line to the material. If material is not included in the article's Creative Commons license and your intended use is not permitted by statutory regulation or exceeds the permitted use, you will need to obtain permission directly from the copyright holder. To view a copy of this license, visit <http://creativecommons.org/licenses/by/4.0/>.

**Editorial Note:** This manuscript has been previously reviewed at another journal that is not operating a transparent peer review scheme. This document only contains reviewer comments and rebuttal letters for versions considered at *Nature Communications*.

Reviewers' Comments:

Reviewer #1:

Remarks to the Author:

Umol is a method for the co-folding of protein with a ligand. The method extends AlphaFold2 architecture to ligand atoms similarly to the recently published RosettaFold-All atoms.

In the revised version authors have added comparisons to additional methods, including NeuralPlexer and RosettaFoldAA. Umol has a performance comparable to other methods. Overall, the paper shows that the problem is challenging and far from being solved.

ROC curves were added to show that ligand pLDDT vs. affinity. I find it strange that only pLDDT values below 50 and above 80 were used, the result is a single-point ROC curve which doesn't say much about significance. The whole idea of the ROC curve is not to use any cut-offs. I recommend adding a p-value comparing the relevant boxplots in Figs. 4a-d

Reviewer #2:

Remarks to the Author:

I have reviewed the manuscript previously for Nature Method. I would like to thank the authors for addressing most of my concerns.

My remaining concern involves overfitting. The author mentioned in their response the potential overfitting of RF-AA. I'm curious if Umol, too, might be affected by this issue. I would suggest adding a discussion about overfitting of these ML methods to guide the readers about when to apply these techniques and when to use classical approaches.

**We are delighted that the manuscript is deemed suitable for publication and thank the reviewers and editors for their time and valuable insights. We have taken the final adjustments into consideration and marked the corresponding changes in red in the manuscript.**

## **REVIEWERS' COMMENTS**

Reviewer #1 (Remarks to the Author):

Umol is a method for the co-folding of protein with a ligand. The method extends AlphaFold2 architecture to ligand atoms similarly to the recently published RosettaFold-All atoms.

In the revised version authors have added comparisons to additional methods, including NeuralPlexer and RosettaFoldAA. Umol has a performance comparable to other methods. Overall, the paper shows that the problem is challenging and far from being solved.

ROC curves were added to show that ligand pLDDT vs. affinity. I find it strange that only pLDDT values below 50 and above 80 were used, the result is a single-point ROC curve which doesn't say much about significance. The whole idea of the ROC curve is not to use any cut-offs. I recommend adding a p-value comparing the relevant boxplots in Figs. 4a-d

**We thank the reviewer for this suggestion and have added p-values to the relevant boxplots in Figure 4 and to the supplementary information (supplementary figure 5):**

We also calculate the p-values between the affinity distributions using a selection of pLDDT <50 or >80. The Corresponding p-values (one-sided ttest associating having a higher affinity value with a lower pLDDT) are 1.58e-17, 5.45e-18, 0.0052 and 0.059 for Kd, Ki, EC50 and IC50 data, respectively (a-d).

Reviewer #2 (Remarks to the Author):

I have reviewed the manuscript previously for Nature Method. I would like to thank the authors for addressing most of my concerns.

My remaining concern involves overfitting. The author mentioned in their response the potential overfitting of RF-AA. I'm curious if Umol, too, might be affected by this issue. I would suggest adding a discussion about overfitting of these ML methods to guide the readers about when to apply these techniques and when to use classical approaches.

**We thank the reviewer for this suggestion and have added a paragraph in the discussion about this issue:**

Overfitting is not observed to the same extent for structure-based docking methods like Vina or Gold (Supplementary Table 1). This is expected as these are based on atomistic scoring functions and thereby do not rely on protein homology to the same extent. The issue with Deep Learning methods having a substantially higher performance on the training set suggests that protein homology plays a significant role in protein-ligand docking. We note here that RFAA has higher performance on the test set than the training set, suggesting potential data leakage between the train and test sets.
